# Supplementary material for: Crystallization of monohydrocalcite in a silica-rich alkaline solution
Source: Royal Society of Chemistry journal article supplement (doi:10.1039/c3ce40624e), 2013-01-01
Supplement: c3ce40624e.pdf [file c3ce40624e.pdf]

## Supplementary information

### S1 the morphology of peanut-like monohydrocalcite at the early stage of the crystallization

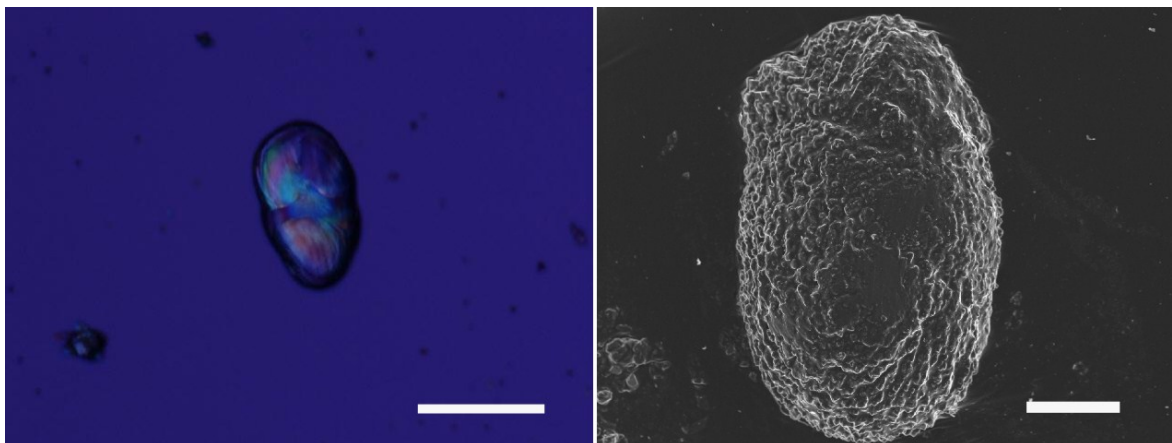

**Fig.S1** The characteristic morphologies of peanut-like monohydrocalcite after two days crystallization: left, an image from optical microscopy (Left, scale bar: 50  $\mu\text{m}$ ); right, an image from FESEM (Right, scale bar: 10  $\mu\text{m}$ ).

### S2 Raman spectrum of crystal in agarose gel

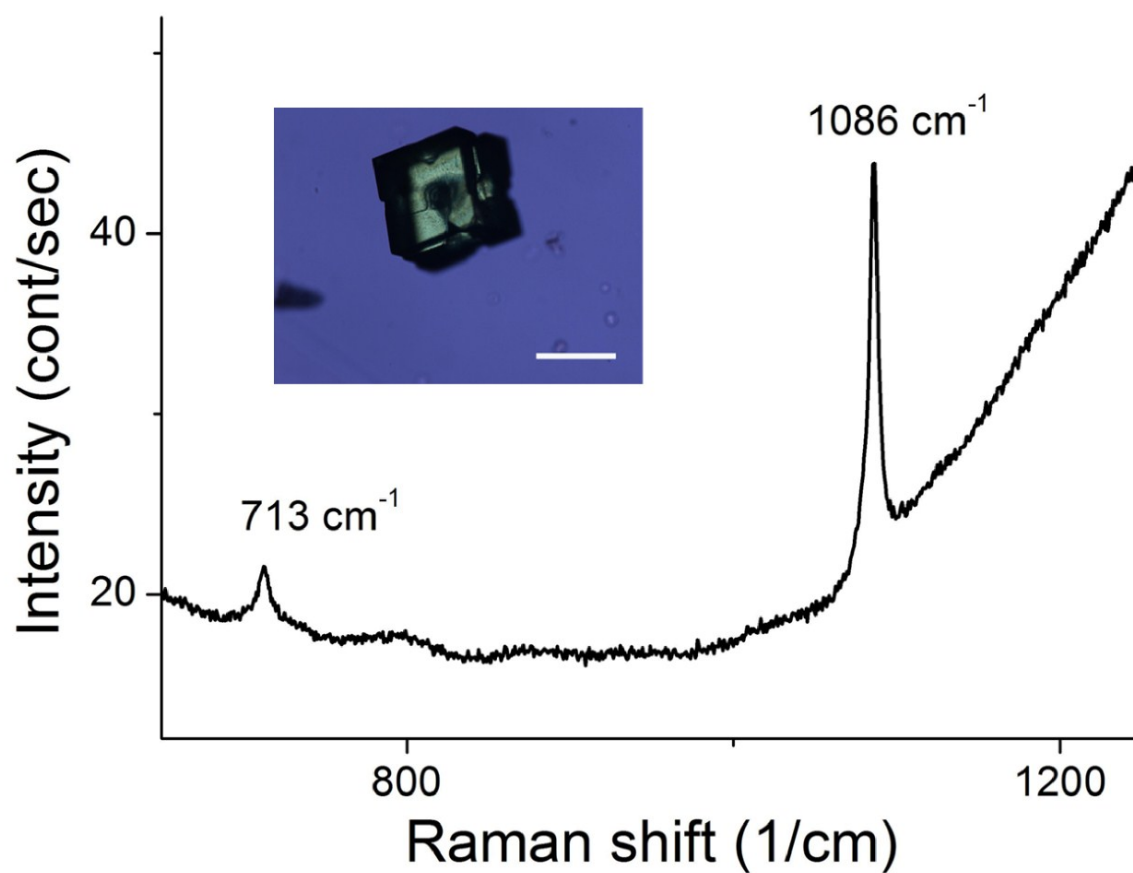

**Fig.S2** Raman spectrum of calcium carbonate (calcite) crystallized in agarose gel. The inset shows an optical microscopy image of a rhombohedral calcite crystal obtained in agarose gels. (Scale bar: 50  $\mu\text{m}$ )

**S3 Characteristic morphologies of monohydrocalcite after 4 weeks crystallization, the more detailed texture study:**

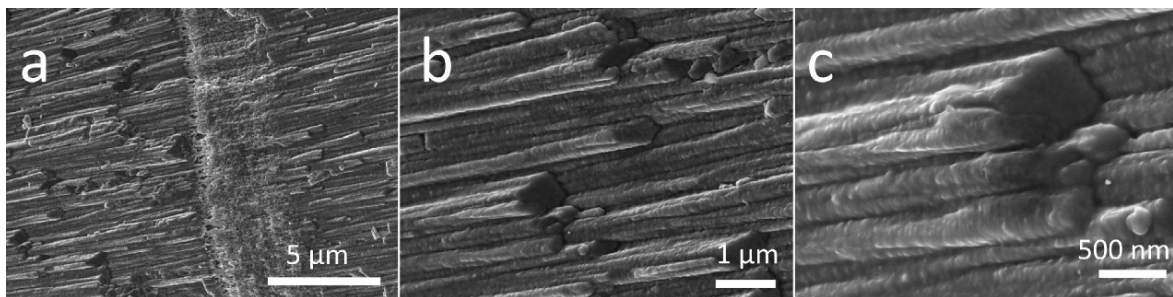

**Fig.S3** High magnified FESEM micrographs of monohydrocalcite: compact layer with cracked band (a), needle-like texture in compact layer (b and c).
